# Supplementary material for: Pan-Cancer Analysis and Experimental Validation Identify ACOT7 as a Novel Oncogene and Potential Therapeutic Target in Lung Adenocarcinoma
Source: MDPI journal article supplement (doi:10.3390/cancers14184522), 2022-09-18
Supplement: s1 [file s1]

**Supplementary Table S1.** Characteristic information of 33 types of cancer included in this study.

| Abbreviation | Full name                                                        | Number of samples |        |
|--------------|------------------------------------------------------------------|-------------------|--------|
|              |                                                                  | Tumor             | Normal |
| ACC          | Adrenocortical carcinoma                                         | 77                | 0      |
| BLCA         | Bladder urothelial carcinoma                                     | 407               | 19     |
| BRCA         | Breast invasive carcinoma                                        | 1098              | 113    |
| CESC         | Cervical squamous cell carcinoma and endocervical adenocarcinoma | 306               | 3      |
| CHOL         | Cholangiocarcinoma                                               | 36                | 9      |
| COAD         | Colon adenocarcinoma                                             | 288               | 41     |
| DLBC         | Lymphoid neoplasm diffuse large B-cell lymphoma                  | 47                | 0      |
| ESCA         | Esophageal carcinoma                                             | 182               | 13     |
| GBM          | Glioblastoma multiforme                                          | 165               | 0      |
| HNSC         | Head and neck squamous cell carcinoma                            | 520               | 44     |
| KICH         | Kidney chromophobe                                               | 66                | 25     |
| KIRC         | Kidney renal clear cell carcinoma                                | 531               | 72     |
| KIRP         | Kidney renal papillary cell carcinoma                            | 289               | 32     |
| LAML         | Acute myeloid leukemia                                           | 173               | 0      |
| LGG          | Brain lower-grade glioma                                         | 522               | 0      |
| LIHC         | Liver hepatocellular carcinoma                                   | 371               | 50     |
| LUAD         | Lung adenocarcinoma                                              | 515               | 59     |
| LUSC         | Lung squamous cell carcinoma                                     | 498               | 50     |
| MESO         | Mesothelioma                                                     | 87                | 0      |
| OV           | Ovarian serous cystadenocarcinoma                                | 427               | 0      |
| PAAD         | Pancreatic adenocarcinoma                                        | 179               | 4      |
| PCPG         | Pheochromocytoma and paraganglioma                               | 182               | 3      |
| PRAD         | Prostate adenocarcinoma                                          | 496               | 52     |
| READ         | Rectum adenocarcinoma                                            | 92                | 10     |
| SARC         | Sarcoma                                                          | 262               | 2      |
| SKCM         | Skin cutaneous melanoma                                          | 496               | 1      |
| STAD         | Stomach adenocarcinoma                                           | 414               | 36     |
| TGCT         | Testicular germ cell tumors                                      | 137               | 0      |
| THCA         | Thyroid carcinoma                                                | 512               | 59     |
| THYM         | Thymoma                                                          | 119               | 2      |
| UCEC         | Uterine corpus endometrial carcinoma                             | 181               | 13     |
| UCS          | Uterine carcinosarcoma                                           | 57                | 0      |
| UVM          | Uveal melanoma                                                   | 79                | 0      |
| Total        |                                                                  | 9784              | 712    |
