# Supplementary material for: Pan-Cancer Analysis and Experimental Validation Identify ACOT7 as a Novel Oncogene and Potential Therapeutic Target in Lung Adenocarcinoma
Source: MDPI journal article supplement (doi:10.3390/cancers14184522), 2022-09-18
Supplement: s1 [file s1]

**Table S2.** Relationship between ACOT7 expression and immune cell infiltration in eight cancers.

| Symbol            | BLCA |       | BRCA |       | HNSC |       | KIRC |       | LUAD |       | STAD |       | THCA |       | THYM |       |
|-------------------|------|-------|------|-------|------|-------|------|-------|------|-------|------|-------|------|-------|------|-------|
|                   | p    | r     | p    | r     | p    | r     | p    | r     | p    | r     | p    | r     | p    | r     | p    | r     |
| CD4_naive         | ***  | -0.19 |      | 0.03  | **   | 0.13  | ***  | -0.15 |      | -0.05 |      | -0.10 | ***  | -0.31 | *    | 0.23  |
| CD8_naive         | ***  | -0.22 |      | -0.04 |      | -0.01 | ***  | -0.40 |      | -0.05 | *    | -0.10 | ***  | -0.25 | ***  | 0.61  |
| Tc                | ***  | 0.30  |      | 0.03  |      | -0.04 | ***  | 0.18  | **   | 0.13  | ***  | 0.19  | ***  | 0.33  |      | -0.03 |
| Tex               | ***  | 0.38  | ***  | 0.19  | *    | 0.10  | ***  | 0.30  | ***  | 0.18  | ***  | 0.31  | ***  | 0.20  |      | 0.12  |
| Tr1               | *    | 0.11  | **   | 0.10  | ***  | -0.18 | ***  | 0.19  |      | -0.02 |      | -0.09 | ***  | 0.33  |      | 0.01  |
| nTreg             | **   | 0.14  | **   | 0.08  | ***  | 0.18  | **   | 0.13  | ***  | 0.28  | ***  | 0.28  | ***  | 0.42  | ***  | -0.30 |
| iTreg             | ***  | 0.27  | ***  | 0.16  |      | -0.04 | ***  | 0.17  | ***  | 0.20  | *    | 0.10  | ***  | 0.44  |      | -0.14 |
| Th1               | ***  | 0.37  | ***  | 0.14  | **   | 0.12  | ***  | 0.26  | ***  | 0.18  | ***  | 0.26  | ***  | 0.30  |      | -0.06 |
| Th2               |      | 0.08  |      | 0.02  | **   | -0.13 | ***  | 0.17  |      | -0.06 | ***  | -0.20 |      | 0.05  | **   | -0.28 |
| Th17              | ***  | -0.19 | ***  | -0.27 |      | 0.03  | ***  | -0.15 | ***  | -0.27 | ***  | -0.24 | ***  | -0.16 |      | 0.15  |
| Tfh               | *    | -0.11 | *    | -0.06 | ***  | -0.23 | ***  | 0.27  | *    | -0.11 | **   | -0.13 | ***  | 0.33  | ***  | 0.48  |
| Tcm               |      | 0.03  | **   | -0.09 | **   | -0.13 | ***  | 0.18  |      | -0.02 |      | -0.05 | ***  | 0.23  | ***  | 0.41  |
| Tem               |      | 0.06  | ***  | 0.11  | ***  | 0.15  |      | 0.04  |      | -0.01 |      | 0.03  | ***  | 0.16  | ***  | -0.34 |
| NKT               |      | 0.09  | ***  | -0.21 |      | 0.02  |      | 0.08  |      | 0.00  |      | -0.04 | ***  | 0.35  | ***  | -0.62 |
| MAIT              |      | -0.08 |      | -0.05 |      | -0.03 | ***  | -0.17 | ***  | -0.16 | ***  | -0.28 | ***  | -0.32 |      | 0.05  |
| DC                | ***  | 0.38  | ***  | 0.20  | ***  | 0.17  |      | 0.07  | **   | 0.14  | ***  | 0.22  | ***  | 0.52  | ***  | 0.52  |
| B_cell            | *    | -0.12 | ***  | 0.11  | ***  | -0.22 | ***  | -0.15 | *    | -0.11 | *    | -0.12 | ***  | -0.16 | ***  | 0.34  |
| Monocyte          | ***  | 0.18  | ***  | 0.10  |      | 0.08  |      | 0.04  | ***  | 0.17  | *    | 0.11  | ***  | 0.24  | ***  | -0.58 |
| Macrophage        | ***  | 0.39  | ***  | 0.13  |      | 0.07  | ***  | 0.17  | ***  | 0.15  |      | 0.08  | ***  | 0.31  | ***  | -0.49 |
| NK                | ***  | 0.21  |      | -0.02 |      | -0.04 | ***  | 0.23  |      | 0.01  |      | 0.01  | ***  | 0.21  | ***  | -0.42 |
| Neutrophil        |      | -0.09 |      | 0.00  | ***  | 0.22  | ***  | -0.19 |      | 0.00  | **   | 0.15  | ***  | -0.44 | ***  | -0.39 |
| Tgd               | ***  | -0.22 | ***  | -0.13 | ***  | -0.23 | ***  | 0.20  | *    | -0.09 |      | 0.07  | ***  | -0.20 |      | -0.02 |
| CD4_T             | ***  | -0.35 | ***  | -0.13 | ***  | -0.25 |      | -0.06 | ***  | -0.18 | ***  | -0.35 | *    | 0.11  | ***  | 0.32  |
| CD8_T             |      | -0.04 |      | -0.02 | ***  | -0.17 | ***  | 0.30  |      | 0.01  |      | 0.07  | ***  | 0.18  | ***  | 0.50  |
| InfiltrationScore | ***  | 0.32  | ***  | 0.14  |      | -0.04 | ***  | 0.26  | **   | 0.12  |      | 0.09  | ***  | 0.43  | ***  | -0.32 |

**Notes:** \* $P < 0.05$ ; \*\* $P < 0.01$ ; \*\*\* $P < 0.001$ .
